# Supplementary material for: Elucidation of Mechanical, Physical, Chemical and Thermal Properties of Microbial Composite Films by Integrating Sodium Alginate with Bacillus subtilis sp
Source: MDPI journal article supplement (doi:10.3390/polym13132103), 2021-06-26
Supplement: s1 [file s1]

Supplementary Material

# Elucidation of Mechanical, Physical, Chemical and Thermal Properties of Microbial Composite Films by Integrating Sodium Alginate with *Bacillus subtilis* sp.

Charles Ng Wai Chun <sup>1</sup>, Husnul Azan Tajarudin <sup>1,\*</sup>, Norli Ismail <sup>2,\*</sup>, Baharin Azahari <sup>3</sup> and Muaz Mohd Zaini Makhtar <sup>1</sup>

<sup>1</sup> School of Industrial Technology, Bioprocess Technology Division, Universiti Sains Malaysia, 11800 Penang, Malaysia; charlesngwaichun@student.usm.my (C.N.W.C.); muazzaini@usm.my (M.M.Z.M.)

<sup>2</sup> School of Industrial Technology, Environmental Division, Universiti Sains Malaysia, 11800 Penang, Malaysia

<sup>3</sup> School of Industrial Technology, Bioresource, Paper and Coatings Division, Universiti Sains Malaysia, 11800 Penang, Malaysia; baharin@usm.my

\* Correspondence: azan@usm.my (H.A.T.); norlii@usm.my (N.I.)

**Citation:** Wai Chun, C.N.; Tajarudin, H.A.; Ismail, N.; Azahari, B.; Mohd Zaini Makhtar, M. Elucidation of Mechanical, Physical, Chemical and Thermal Properties of Microbial Composite Films by Integrating Sodium Alginate with *Bacillus subtilis* sp. *Polymers* **2021**, *13*, 2103. <https://doi.org/10.3390/polym13132103>

Academic Editor: Hiroshi Ito

Received: 18 May 2021

Accepted: 28 May 2021

Published: 26 June 2021

**Publisher's Note:** MDPI stays neutral with regard to jurisdictional claims in published maps and institutional affiliations.

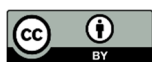

**Copyright:** © 2021 by the authors. Licensee MDPI, Basel, Switzerland. This article is an open access article distributed under the terms and conditions of the Creative Commons Attribution (CC BY) license (<http://creativecommons.org/licenses/by/4.0/>).

**Table S1.** Tensile strength, breaking strain and toughness of microbial composite films.

| Mass of <i>Bacillus subtilis</i> (g) | Triplicate | Tensile strength (MPa) | Breaking strain (%) | Toughness (MJ/m <sup>3</sup> ) |
|--------------------------------------|------------|------------------------|---------------------|--------------------------------|
| 0                                    | 1          | 0.4                    | 85.644              | 0.004                          |
|                                      | 2          | 0.584                  | 84.384              | 0.009                          |
|                                      | 3          | 0.849                  | 83.088              | 0.034                          |
| Average                              |            | 0.611                  | 84.372              | 0.016                          |
| Standard deviation                   |            | 0.226                  | 6.906               | 0.016                          |
| 0.1                                  | 1          | 0.581                  | 85.314              | 0.025                          |
|                                      | 2          | 0.626                  | 84.35               | 0.015                          |
|                                      | 3          | 0.653                  | 84.882              | 0.009                          |
| Average                              |            | 0.62                   | 84.849              | 0.016                          |
| Standard deviation                   |            | 0.036                  | 0.483               | 0.008                          |
| 0.2                                  | 1          | 0.753                  | 84.65               | 0.02                           |
|                                      | 2          | 0.567                  | 84.484              | 0.016                          |
|                                      | 3          | 0.585                  | 86.144              | 0.019                          |
| Average                              |            | 0.635                  | 85.092              | 0.0183                         |
| Standard deviation                   |            | 0.102                  | 0.914               | 0.0021                         |
| 0.3                                  | 1          | 0.834                  | 86.01               | 0.034                          |
|                                      | 2          | 0.68                   | 85.048              | 0.022                          |
|                                      | 3          | 0.611                  | 84.45               | 0.015                          |
| Average                              |            | 0.709                  | 85.169              | 0.024                          |
| Standard deviation                   |            | 0.114                  | 0.787               | 0.009                          |
| 0.4                                  | 1          | 0.776                  | 82.39               | 0.022                          |
|                                      | 2          | 0.604                  | 83.354              | 0.016                          |
|                                      | 3          | 0.829                  | 89.832              | 0.035                          |
| Average                              |            | 0.736                  | 85.192              | 0.024                          |
| Standard deviation                   |            | 0.118                  | 4.047               | 0.009                          |
| 0.5                                  | 1          | 0.947                  | 89.166              | 0.061                          |
|                                      | 2          | 0.756                  | 85.812              | 0.03                           |
|                                      | 3          | 0.871                  | 87.24               | 0.044                          |
| Average                              |            | 0.858                  | 87.406              | 0.0450                         |
| Standard deviation                   |            | 0.096                  | 1.683               | 0.016                          |
| 0.6                                  | 1          | 0.888                  | 85.646              | 0.033                          |
|                                      | 2          | 0.776                  | 85.878              | 0.022                          |
|                                      | 3          | 0.829                  | 86.94               | 0.039                          |
| Average                              |            | 0.831                  | 86.155              | 0.0310                         |
| Standard deviation                   |            | 0.056                  | 0.69                | 0.009                          |

**Table S2.** Thickness of microbial composite films.

| Mass of <i>Bacillus subtilis</i> (g) | Triplicate | Readings of Precision Micrometer (mm) |       |       |       |       | Average (mm) | Overall Average (mm) |
|--------------------------------------|------------|---------------------------------------|-------|-------|-------|-------|--------------|----------------------|
| 0.0 g                                | 1          | 0.505                                 | 0.604 | 0.524 | 0.576 | 0.513 | 0.544        | 0.578                |
|                                      | 2          | 0.583                                 | 0.636 | 0.581 | 0.617 | 0.642 | 0.612        |                      |
|                                      | 3          | 0.661                                 | 0.516 | 0.528 | 0.587 | 0.601 | 0.578        |                      |
| 0.1 g                                | 1          | 0.607                                 | 0.623 | 0.643 | 0.677 | 0.611 | 0.632        | 0.665                |
|                                      | 2          | 0.618                                 | 0.703 | 0.692 | 0.687 | 0.717 | 0.683        |                      |
|                                      | 3          | 0.762                                 | 0.603 | 0.702 | 0.656 | 0.677 | 0.680        |                      |
| 0.2 g                                | 1          | 0.766                                 | 0.781 | 0.793 | 0.79  | 0.658 | 0.758        | 0.761                |
|                                      | 2          | 0.689                                 | 0.776 | 0.782 | 0.743 | 0.762 | 0.750        |                      |
|                                      | 3          | 0.801                                 | 0.812 | 0.793 | 0.762 | 0.699 | 0.773        |                      |
| 0.3 g                                | 1          | 0.885                                 | 0.909 | 0.913 | 0.927 | 0.816 | 0.890        | 0.892                |
|                                      | 2          | 0.805                                 | 0.912 | 0.973 | 0.873 | 0.991 | 0.911        |                      |
|                                      | 3          | 0.943                                 | 0.947 | 0.868 | 0.796 | 0.818 | 0.874        |                      |
| 0.4 g                                | 1          | 1.011                                 | 1.073 | 0.934 | 0.987 | 0.907 | 0.982        | 1.002                |
|                                      | 2          | 0.963                                 | 0.998 | 1.087 | 1.106 | 0.977 | 1.026        |                      |
|                                      | 3          | 0.936                                 | 0.948 | 1.044 | 1.087 | 0.976 | 0.998        |                      |
| 0.5 g                                | 1          | 1.082                                 | 1.073 | 1.172 | 1.007 | 1.086 | 1.084        | 1.057                |
|                                      | 2          | 1.073                                 | 1.088 | 1.074 | 1.096 | 0.992 | 1.065        |                      |
|                                      | 3          | 0.976                                 | 1.067 | 1.082 | 1.012 | 1.006 | 1.029        |                      |
| 0.6 g                                | 1          | 1.103                                 | 1.057 | 0.974 | 1.109 | 1.008 | 1.050        | 1.059                |
|                                      | 2          | 1.063                                 | 0.969 | 1.043 | 1.101 | 1.048 | 1.045        |                      |
|                                      | 3          | 1.17                                  | 1.112 | 1.051 | 1.008 | 1.072 | 1.826        |                      |

**Table S3.** Opacity (white light) of microbial composite films.

| Mass of <i>Bacillus subtilis</i> (g) | Triplicate | Opacity (White light, %) | Average | High  | Low   | Standard deviation |
|--------------------------------------|------------|--------------------------|---------|-------|-------|--------------------|
| 0                                    | 0.1        | 7.46                     | 7.52    | 7.73  | 7.39  | 0.18               |
|                                      | 0.2        | 7.39                     |         |       |       |                    |
|                                      | 0.3        | 7.73                     |         |       |       |                    |
| 0.1                                  | 1.1        | 7.83                     | 8.1     | 8.28  | 7.83  | 0.24               |
|                                      | 1.2        | 8.28                     |         |       |       |                    |
|                                      | 1.3        | 8.18                     |         |       |       |                    |
| 0.2                                  | 2.1        | 8.3                      | 8.39    | 8.44  | 8.3   | 0.07               |
|                                      | 2.2        | 8.44                     |         |       |       |                    |
|                                      | 2.3        | 8.48                     |         |       |       |                    |
| 0.3                                  | 3.1        | 10.31                    | 9.19    | 10.31 | 8.49  | 0.98               |
|                                      | 3.2        | 8.49                     |         |       |       |                    |
|                                      | 3.3        | 8.78                     |         |       |       |                    |
| 0.4                                  | 6.1        | 15.7                     | 12.16   | 15.7  | 10.02 | 3.09               |
|                                      | 6.2        | 10.02                    |         |       |       |                    |
|                                      | 6.3        | 10.74                    |         |       |       |                    |
| 0.5                                  | 5.1        | 13.43                    | 13.65   | 14.15 | 13.38 | 0.43               |

|     |     |       |       |       |       |      |
|-----|-----|-------|-------|-------|-------|------|
|     | 5.2 | 14.15 |       |       |       |      |
|     | 5.3 | 13.38 |       |       |       |      |
| 0.6 | 4.1 | 16.76 | 16.45 | 16.76 | 16.21 | 0.28 |
|     | 4.2 | 16.21 |       |       |       |      |
|     | 4.3 | 16.38 |       |       |       |      |

**Table S4.** Opacity (black light) of microbial composite films.

| Mass of <i>Bacillus subtilis</i> (g) | Triplicate | Opacity<br>(Black light, %) | Average | High  | Low   | Standard deviation |
|--------------------------------------|------------|-----------------------------|---------|-------|-------|--------------------|
| 0                                    | 0.1        | 38.88                       | 38.41   | 39.14 | 38.09 | 0.64               |
|                                      | 0.2        | 38.09                       |         |       |       |                    |
|                                      | 0.3        | 39.14                       |         |       |       |                    |
| 0.1                                  | 1.1        | 37.9                        | 37.86   | 38.44 | 37.34 | 0.6                |
|                                      | 1.2        | 38.44                       |         |       |       |                    |
|                                      | 1.3        | 37.34                       |         |       |       |                    |
| 0.2                                  | 2.1        | 37.92                       | 38.61   | 38.98 | 37.92 | 0.6                |
|                                      | 2.2        | 38.94                       |         |       |       |                    |
|                                      | 2.3        | 38.98                       |         |       |       |                    |
| 0.3                                  | 3.1        | 43.03                       | 39.29   | 43.03 | 36.92 | 3.28               |
|                                      | 3.2        | 36.92                       |         |       |       |                    |
|                                      | 3.3        | 37.93                       |         |       |       |                    |
| 0.4                                  | 6.1        | 50.56                       | 41.69   | 50.56 | 36.13 | 7.77               |
|                                      | 6.2        | 36.13                       |         |       |       |                    |
|                                      | 6.3        | 38.38                       |         |       |       |                    |
| 0.5                                  | 5.1        | 39.99                       | 40.55   | 50.56 | 39.99 | 0.52               |
|                                      | 5.2        | 40.66                       |         |       |       |                    |
|                                      | 5.3        | 41.01                       |         |       |       |                    |
| 0.6                                  | 4.1        | 41.12                       | 41.18   | 42.07 | 40.36 | 0.86               |
|                                      | 4.2        | 40.36                       |         |       |       |                    |
|                                      | 4.3        | 42.07                       |         |       |       |                    |

**Table S5.** Brightness of microbial composite films.

| Mass of <i>Bacillus subtilis</i> (g) | Triplicate | Readings |      |      | Average | High | Low  | Standard deviation |
|--------------------------------------|------------|----------|------|------|---------|------|------|--------------------|
|                                      |            | 1        | 2    | 3    |         |      |      |                    |
| 0                                    | 0.1        | 4.23     | 4.14 | 4.06 | 4.24    | 4.76 | 3.9  | 0.25               |
|                                      | 0.2        | 4.05     | 3.9  | 4.37 |         |      |      |                    |
|                                      | 0.3        | 4.76     | 4.35 | 4.34 |         |      |      |                    |
| 0.1                                  | 1.1        | 4.23     | 4.14 | 4.06 | 4.24    | 4.76 | 3.9  | 0.25               |
|                                      | 1.2        | 4.05     | 3.9  | 4.37 |         |      |      |                    |
|                                      | 1.3        | 4.76     | 4.35 | 4.34 |         |      |      |                    |
| 0.2                                  | 2.1        | 7.06     | 6.52 | 6.62 | 6.65    | 7.06 | 6.24 | 0.27               |
|                                      | 2.2        | 6.28     | 6.24 | 6.79 |         |      |      |                    |
|                                      | 2.3        | 6.84     | 6.62 | 6.86 |         |      |      |                    |
| 0.3                                  | 3.1        | 6.14     | 7.2  | 6.54 | 6.67    | 7.3  | 5.57 | 0.54               |

|     |     |       |      |      |      |       |      |      |
|-----|-----|-------|------|------|------|-------|------|------|
|     | 3.2 | 5.57  | 6.88 | 6.68 |      |       |      |      |
|     | 3.3 | 7.07  | 7.3  | 6.69 |      |       |      |      |
| 0.4 | 4.1 | 7.38  | 8.99 | 5.22 | 7.38 | 8.99  | 5.22 | 1.17 |
|     | 4.2 | 7.42  | 6.47 | 6.57 |      |       |      |      |
|     | 4.3 | 8.51  | 7.51 | 8.34 |      |       |      |      |
| 0.5 | 6.1 | 7.32  | 8.23 | 8.48 | 7.88 | 8.48  | 7.32 | 0.49 |
|     | 6.2 | 7.91  | 8.23 | 8.47 |      |       |      |      |
|     | 6.3 | 7.33  | 7.38 | 7.58 |      |       |      |      |
| 0.6 | 5.1 | 10.62 | 9.26 | 9.2  | 8.19 | 10.62 | 6.64 | 1.32 |
|     | 5.2 | 6.92  | 7.39 | 6.64 |      |       |      |      |
|     | 5.3 | 7.36  | 7.7  | 8.66 |      |       |      |      |

Table S6. Conductivity of microbial composite films.

| Mass of <i>Bacillus subtilis</i> (g) | Triplicate | Conductivity (mV) | Average (mV) |
|--------------------------------------|------------|-------------------|--------------|
| 0                                    | 1          | 11                | 11.33        |
|                                      | 2          | 10                |              |
|                                      | 3          | 13                |              |
| 0.1                                  | 1          | 12                | 12           |
|                                      | 2          | 13                |              |
|                                      | 3          | 11                |              |
| 0.2                                  | 1          | 16                | 16.33        |
|                                      | 2          | 15                |              |
|                                      | 3          | 18                |              |
| 0.3                                  | 1          | 15                | 17.33        |
|                                      | 2          | 19                |              |
|                                      | 3          | 18                |              |
| 0.4                                  | 1          | 19                | 19.67        |
|                                      | 2          | 19                |              |
|                                      | 3          | 21                |              |
| 0.5                                  | 1          | 27                | 26           |
|                                      | 2          | 26                |              |
|                                      | 3          | 25                |              |
| 0.6                                  | 1          | 25                | 26.33        |
|                                      | 2          | 28                |              |
|                                      | 3          | 26                |              |

Table S7. Water absorption of microbial composite films.

| Mass of <i>Bacillus subtilis</i> (g) | Triplicate | Weight of dried films (g) | Weight of wet films (g) | Percentage of water absorption (%) | Average (%) |
|--------------------------------------|------------|---------------------------|-------------------------|------------------------------------|-------------|
| 0                                    | 1          | 0.07                      | 0.26                    | 271.43                             | 264.29      |
|                                      | 2          | 0.07                      | 0.26                    | 271.43                             |             |
|                                      | 3          | 0.08                      | 0.28                    | 250                                |             |
| 0.1                                  | 1          | 0.07                      | 0.27                    | 285.71                             | 269.05      |
|                                      | 2          | 0.08                      | 0.28                    | 250                                |             |

|     |   |      |      |        |        |
|-----|---|------|------|--------|--------|
|     | 3 | 0.07 | 0.26 | 271.43 |        |
| 0.2 | 1 | 0.08 | 0.29 | 262.5  | 270.83 |
|     | 2 | 0.08 | 0.31 | 287.5  |        |
|     | 3 | 0.08 | 0.29 | 262.5  |        |
| 0.3 | 1 | 0.08 | 0.3  | 275    | 279.17 |
|     | 2 | 0.08 | 0.3  | 275    |        |
|     | 3 | 0.08 | 0.31 | 287.5  |        |
| 0.4 | 1 | 0.08 | 0.31 | 287.5  | 289.35 |
|     | 2 | 0.09 | 0.32 | 255.56 |        |
|     | 3 | 0.08 | 0.34 | 325    |        |
| 0.5 | 1 | 0.08 | 0.34 | 325    | 300.93 |
|     | 2 | 0.09 | 0.34 | 277.78 |        |
|     | 3 | 0.09 | 0.36 | 300    |        |
| 0.6 | 1 | 0.09 | 0.37 | 311.11 | 307.78 |
|     | 2 | 0.1  | 0.39 | 290    |        |
|     | 3 | 0.09 | 0.38 | 322.22 |        |

Table S8. Thermogravimetric Analysis (TGA).

| Step | Value             | Sodium alginate film (Control) | Step                  | 0.5 g microbial composite film |
|------|-------------------|--------------------------------|-----------------------|--------------------------------|
| 1    | Onset Temperature | 208.36 °C                      | -9.58%<br>(0.52 mg)   | 211.21 °C                      |
|      | Residue           | 70.11%<br>(5.27 mg)            |                       | 66.12%<br>(3.62 mg)            |
|      | Inflection Point  | 211.99 °C                      |                       | 218.99 °C                      |
|      | Midpoint          | 212.25 °C                      |                       | 221.95 °C                      |
| 2    | Onset Temperature | 248.02 °C                      | -25.42%<br>(-1.39 mg) | 252.69 °C                      |
|      | Residue           | 42.86%<br>(3.22 mg)            |                       | 40.69%<br>(2.23 mg)            |
|      | Inflection Point  | 267.82 °C                      |                       | 270.44 °C                      |
|      | Midpoint          | 267.73 °C                      |                       | 277.19 °C                      |
| 3    | Onset Temperature | 417.09 °C                      | -6.21%<br>(-0.34 mg)  | 431.08 °C                      |
|      | Residue           | 34.05%<br>(2.56 mg)            |                       | 34.48%<br>(1.89 mg)            |
|      | Inflection Point  | 436.80 °C                      |                       | 445.46 °C                      |
|      | Midpoint          | 443.61 °C                      |                       | 466.16 °C                      |
| 4    | Onset Temperature | 746.39 °C                      | -13.30%<br>(0.73 mg)  | 657.30 °C                      |
|      | Residue           | 25.75%<br>(1.94 mg)            |                       | 21.18%<br>(1.16 mg)            |
|      | Inflection Point  | 777.03 °C                      |                       | 754.14 °C                      |
|      | Midpoint          | 744.01 °C                      |                       | 701.79 °C                      |
